# Supplementary material
Source: MDPI journal article supplement (https://www.mdpi.com/2079-6412/12/3/361)
Supplement: s1 [file s1]

## *Supplementary Materials*

### **Table of Contents**

|                                                                |              |
|----------------------------------------------------------------|--------------|
| 1. $^1\text{H}$ -NMR spectrum of Levulinic acid                | <i>p. S2</i> |
| 2. $^{13}\text{C}$ -NMR spectrum of Levulinic acid             | <i>p.S3</i>  |
| 3. $^1\text{H}$ -NMR spectrum of succinic acid                 | <i>p. S4</i> |
| 4. $^{13}\text{C}$ -NMR spectrum of succinic acid              | <i>p. S5</i> |
| 5. . <i>FTIR-ATR spectrum of polymer of ethyl methacrylate</i> | <i>p. S6</i> |

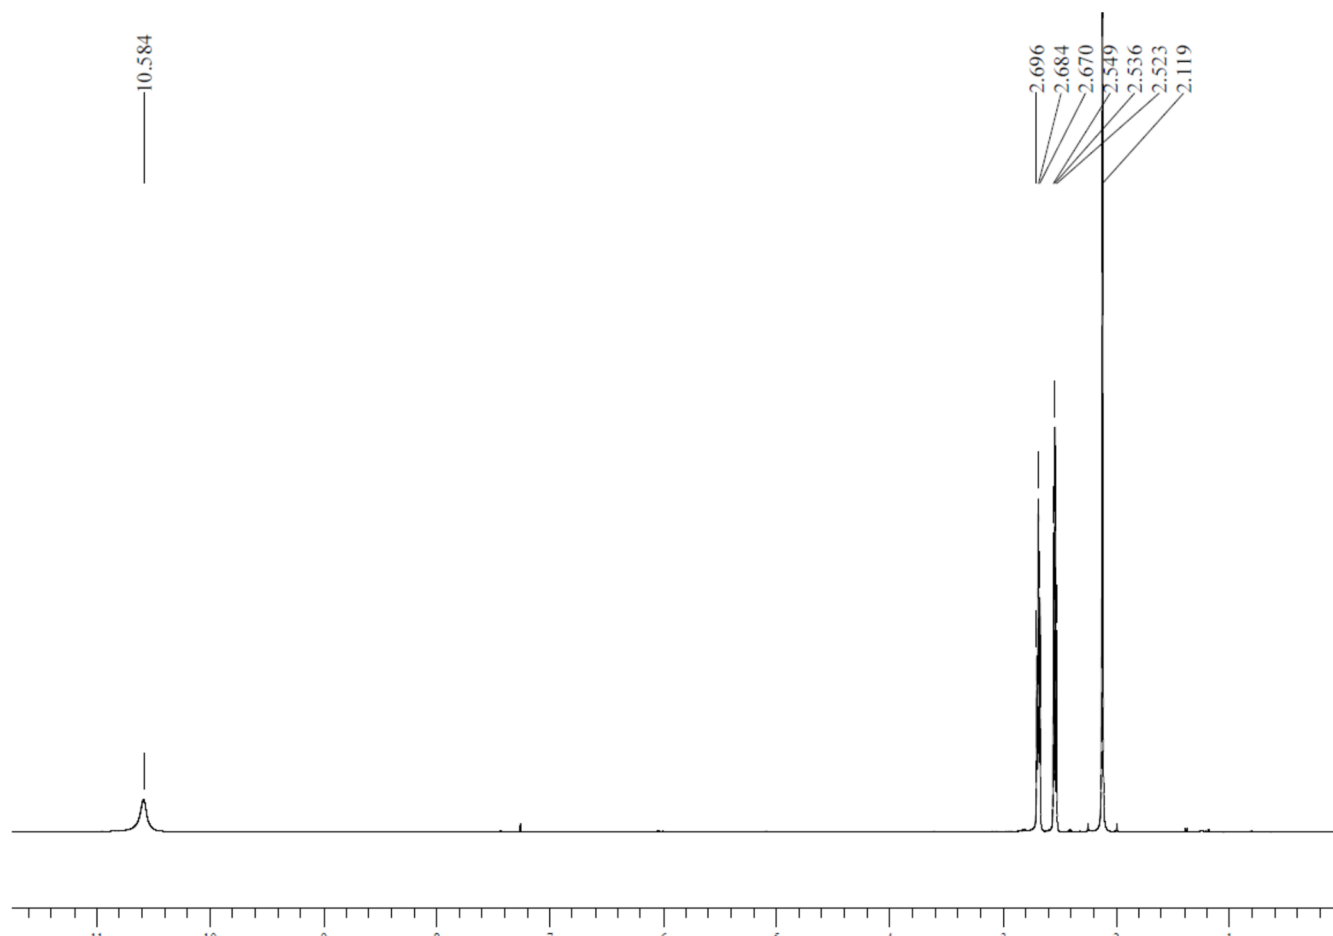

Figure S1.  $^1\text{H}$ -NMR (500 MHz, in  $\text{CDCl}_3$ ) of levulinic acid

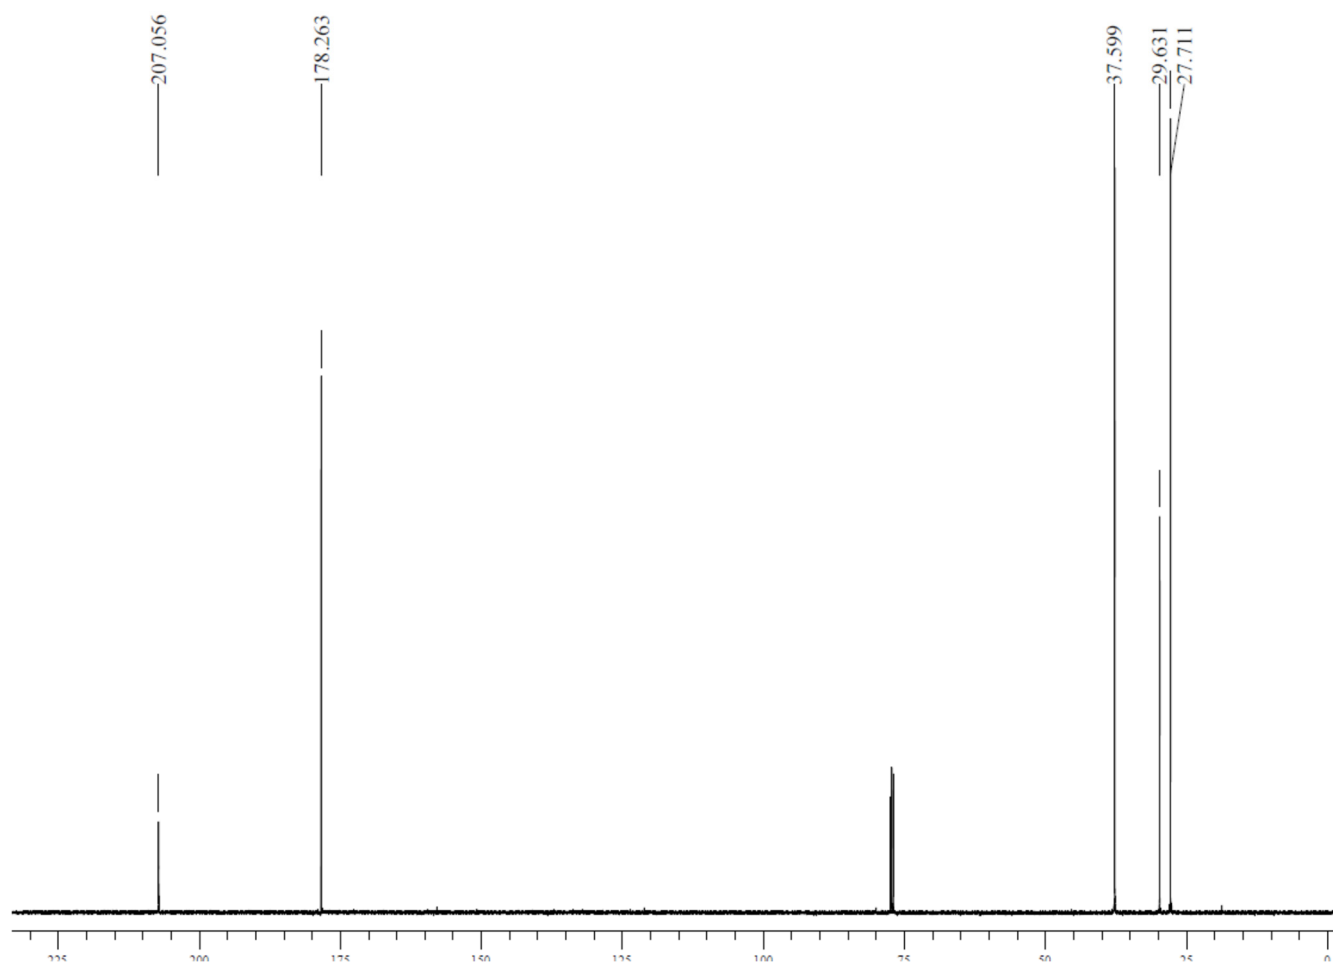

Figure S2.  $^{13}\text{C}$ -NMR (125 MHz, in  $\text{CDCl}_3$ ) of levulinic acid

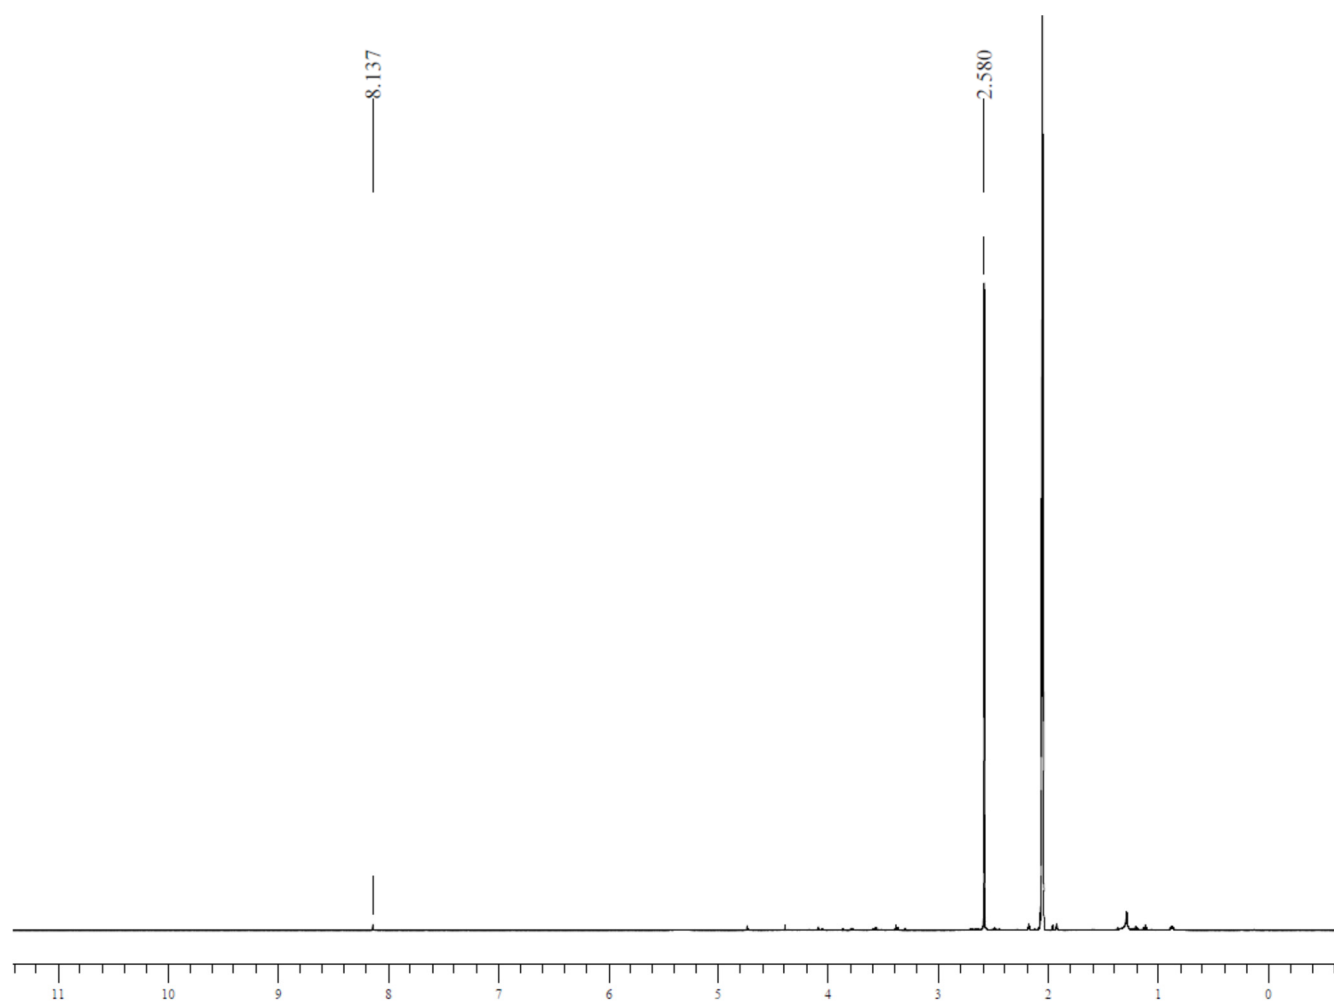

*Figure S3.*  $^1\text{H}$ -NMR (500 MHz, in  $\text{Acetone-d}_6$ ) of succinic acid

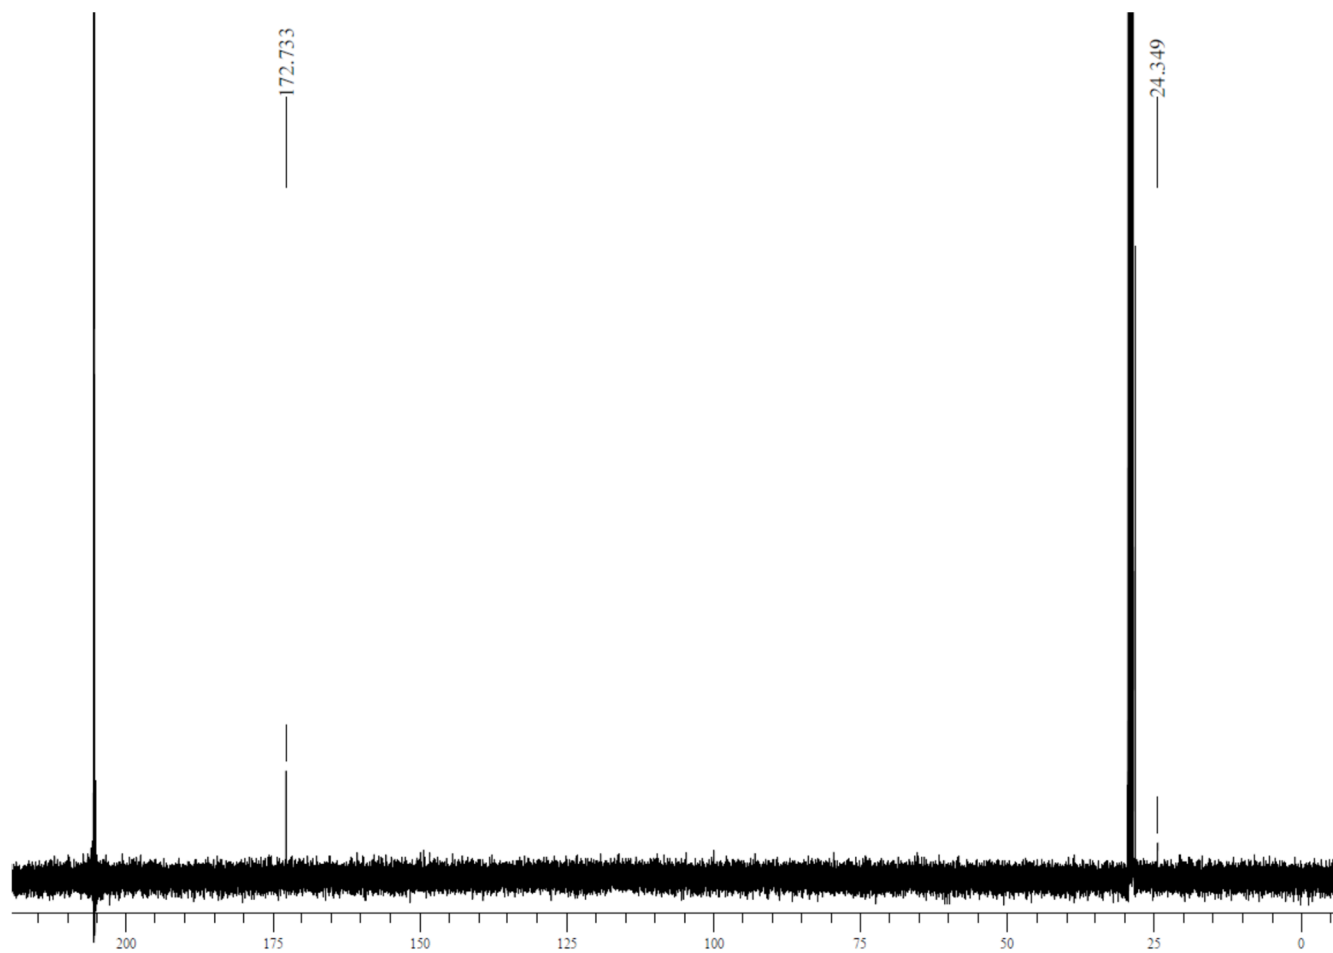

Figure S4.  $^{13}\text{C}$ -NMR (125 MHz, in Acetone  $d_6$ ) of succinic acid

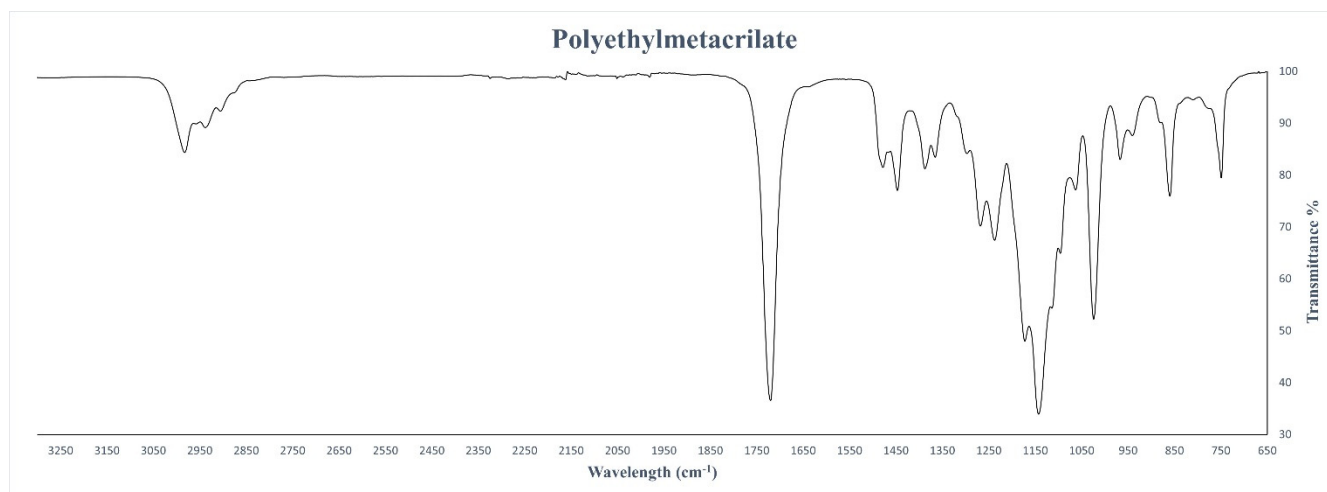

*Figure S5.* FTIR-ATR spectrum of polymer of polyethylmetacrilate
